# Supplementary material for: Invasive Haemophilus influenzae Serotype A in the Post-Hib Vaccine Era: A Systematic Review and Meta-analysis
Source: Research Square preprint supplement (doi:10.21203/rs.3.rs-8860456/v1), 2026-02-25
Supplement: Supplementary file 1 [file e6aff3644ec57e0217d7b617.docx]

Table S1 Epidemiological characteristics of Hia Infections from 1988- 2023

| Study (year) | Location | Years studied | Infection type | Vaccination period | Clinical presentation | Co-morbidities | Age | Est. Hia incidence/100 000 | Sample size(*n*) | No. Hia (*n*) | Case fatality ratio |
| --- | --- | --- | --- | --- | --- | --- | --- | --- | --- | --- | --- |
| Tsang et al., 2017 | Canada | 2007 - 2014. | Invasive | Post-vaccination | N/A | N/A | N/A | NA | 882 | 204 | N/A |
| Sill and Tsang 2008 | Canada | 1990 to 2006 | Invasive | Post-vaccination | N/A | N/A | N/A | N/A | 236 | 51 | N/A |
| Bertran et al., 2023 | England | 2008–2022 | Invasive | Post-vaccination | Pneumonia (52%), Septicaemia (17%), Meningitis (13%) | Chronic lung disease (16%), Chronic heart disease (25%), Malignancy or immunosuppression (25% | <1 to > 65 years | 0.03 cases per 100 000 | 7002 | 52 | 7.7% (95% CI 2·1–19·7; four of 52 patients) |
| Bajanca-Lavado et al., 2022 | Portugal | 2015–2019 | Carriage | Post-vaccination | Healthy Children | N/A | 0-6years | N/A | 1282 | 4 |  |
| Tsang et al., 2016 | Canada | 2000 to 2012 | Invasive | Post-vaccination | N/A | N/A | <1 year old | 13.7 per 100,000 population | 71 | 43 | 9.10% |
| Bruce et al., 2008 | Canada & USA | 2000–2005 | Invasive | Post-vaccination | Meningitis, Pneumonia, Bacteremia | N/A | 3 months - 75 years | 0.9 cases per 100,000 | 132 | 42 | 5% |
| Staples et al., 2017 | Australia | 2001–2015 | Invasive | Post-vaccination | N/A | N/A | <1 to 80 years | N/A | 745 | 36 | N/A |
| Tsang et al., 2006 | Canada | 2000 to 2004 | Invasive | Post-vaccination | N/A | N/A | N/A | N/A | 52 | 26 | N/A |
| Millar et al., 2005 | USA | 1988–2003 | Invasive | Post-vaccination | Meningitis (50%), pneumonia (27.1%) | N/A | 12 (4–59) months | 20.2 cases per 100,000 population less 5 years | 222 | 76 | 2.60% |
| Lima et al., 2010 | Brazil | 1999 - 2007 | Invasive | Post-vaccination | Meningitis | N/A | <5 years to 4 | 0.05 cases per 100,000 population | 149 | 23 | 14.30% |
| Ladhani et al., 2010 | Austria, England, Wales, Finland, Greece. Iceland, Ireland, Italy, Malta, Portugal, Scotland, Slovenia | 1996 - 2006 | Invasive | Post-vaccination | Meningitis (23.1%), Bacteremia (19.2%), Pneumonia (11.2%) | N/A | 2.1 (0.8–43.7) years | 0.01 cases per 1,000,000 population | 690 | 26 | 11.50% |
| Sadeghi-Aval et al., 2013 | Canada | 2009 - 2011 | Invasive | Post-vaccination | Pneumonia (60%), Meningitis (40%) | N/A | 8months to 45years | N/A | 12 | 5 | N/A |
| Plumb et al., 2018 | USA | 2002 - 2014 | Invasive | Post-vaccination | Meningitis | N/A | 7 (3–98) months | 2.7 cases per 100,000 children aged under 10 years | 89 | 36 | 11.10% |
| Tsang et al., 2017 | Canada | 2010 - 2013 | Invasive | Post-vaccination | N/A | N/A | 11months to >10 | N/A | 21 | 20 | N/A |
| Bruce et al., 2013 | USA | 2002 –2011 | Invasive | Post-vaccination | meningitis (n=6), Pneumonia with bacteremia (n=3), Septic arthritis (n=2), cellulitis (n = 1), and bacteremia (n = 1) | otitis media, chronic pulmonary disease, | 0.3–48 years | 5.4 cases per 100, 000 <5 years (95% CI 3.6–7.7) | 866 | 32 | 9.37% |
| Eton et al., 2017 | Canada | 2010-2015 | Invasive | Post-vaccination | pneumonia | N/A | 3 months to 71 years | 3.1 cases per 100000 population | 10 | 5 | 20% |
| Tonnsessen et al., 2022 | Norway | 2017-2021 | Invassive | Post-vaccination | N/A | N/A | N/A | N/A | 245 | 15 | N/A |
| Crandall et al., 2019 | USA | 2007-2017 | Invasive | Post-vaccination | meningitis (52.9%), Bacteremia (19.6%), pneumonia with bacteremia (13.7%), septic arthritis (13.7%) | N/A | 6.2–41 months | 0.5 cases per 100,000 population | 51 | 51 | 1.96% |
| Deghmane et al., 2019 | France | 2017 | Invasive | Post-vaccination | Bacteremia, Meningitis | N/A | 0-4 years | N/A | 138 | 7 | N/A |
| Desai et al., 2015 | Canada | 2004 - 2013 | Invasive | Post-vaccination | Bacteremia, Meningitis | N/A | 1 month to 102 years | 0.08 cases/100,000 | 1331 | 67 | N/A |
| Dudukina et al., 2020 | Netherlands, Spain and Portugal | 2013 - 2015 | Invasive | Post-vaccination | Bacteremia, Meningitis | N/A | 0 - 19 years | N/A | 267 | 3 | N/A |
| McTaggart et al., 2021 | Canada | 2014 - 2018 | Invasive | Post-vaccination | Bacteremia (88.2%), Meningitis (4.7%) | N/A | <1 to 102 years | N/A | 1273 | 114 | N/A |
| Potts et al., 2022 | USA | 2016 | Invasive | Post-vaccination | Bacteremia, Meningitis | N/A | N/A | N/A | 700 | 51 | N/A |
| Shuel et al., 2011 | Canada | 2008 - 2009 | Invasive | Post-vaccination | N/A | N/A | <1 to 70 | N/A | 98 | 10 | N/A |
| Chelbi et al., 2024 | Tunisia | 2013 - 2023 | Invasive | Post-vaccination | Meningitis | N/A | <6months | N/A | 48 | 2 | N/A |
| Heliodoro et al., 2020 | Portugal | 2011-2013 | Invasive | Post-vaccination | Bacteremia, Meningitis | N/A | <5years | N/A | 260 | 7 | N/A |
| Whittaker et al., 2017 | Belgium, Cyprus, the Czech Republic, Denmark, Finland, Ireland, Italy, the Netherlands, Norway, Slovenia, Spain, and the United Kingdom | 2007 - 2014 | Invasive | Post-vaccination | N/A | N/A | <1 to >60 | N/A | 8,781 | 23 | N/A |
| Bajanca-Lavado et al., 2014 | Portugal | 2002 - 2010 | Invasive | Post-vaccination | Meningitis, Bacteremia | N/A | N/A | N/A | 144 | 3 | N/A |
| Ulanova et al., 2023 | Canada | 2015 - 2019 | Carriage | Post-vaccination | healthy children undergoing routine dental surgery | N/A | N/A | N/A | 438 | 34 | N/A |

N/A: Not reported or available

Table S2 Antimicrobial resistance patterns of Hia isolates from included studies

| Study (year) | Country | Total isolates | Ampicillin | Tetracyclin | Clarithromycin | Trimethoprim-sulfamethoxazole | Other antibiotics | β-lactamase producers |
| --- | --- | --- | --- | --- | --- | --- | --- | --- |
| Tsang et al., 2017 | Canada | 204 | 3 | 1 | 1 | N/A | MDR (n=1) | Yes (n=4) |
| Sill and Tsang, 2008 | Canada | 51 | 1 | N/A | N/A | N/A | N/A | N/A |
| Staples et al., 2017 | Australia | 36 | N/A | N/A | N/A | N/A | N/A | No |
| Tsang et al., 2006 | Canada | 26 | 1 | N/A | N/A | N/A | N/A | Yes (n=1) |
| Sadeghi-Aval et al., 2013 | Canada | 5 | 0 | 0 | 0 | N/A | N/A | No |
| Tsang et al., 2017 | Canada | 20 | 0 | 0 | 0 | N/A | 0 | No |
| Eton et al., 2017 | Canada | 5 | 0 | N/A | N/A | N/A | N/A | N/A |
| Deghmane et al., 2019 | France | 7 | 0 | N/A | N/A | N/A | N/A | No |
| McTaggart et al., 2021 | Canada | 114 | 3 | 1 | 0 | 5 | N/A | Yes (n=3) |
| Potts et al., 2022 | USA | 51 | 2 | N/A | N/A | N/A | N/A | N/A |

N/A: Not reported or available

Table S3 PRISMA 2020 Checklist

| **Section and Topic** | **Item #** | **Checklist item** | | **Location where item is reported** | |
| --- | --- | --- | --- | --- | --- |
| **TITLE** | | | |  | |
| Title | 1 | Identify the report as a systematic review. | | Line 1-2 | |
| **ABSTRACT** | | | |  | |
| Abstract | 2 | See the PRISMA 2020 for Abstracts checklist. | | Line 6-19 | |
| **INTRODUCTION** | | | |  | |
| Rationale | 3 | Describe the rationale for the review in the context of existing knowledge. | | Line 41-46 | |
| Objectives | 4 | Provide an explicit statement of the objective(s) or question(s) the review addresses. | | Line 47-49 | |
| **METHODS** | | | |  | |
| Eligibility criteria | 5 | Specify the inclusion and exclusion criteria for the review and how studies were grouped for the syntheses. | | Line 250-257 | |
| Information sources | 6 | Specify all databases, registers, websites, organisations, reference lists and other sources searched or consulted to identify studies. Specify the date when each source was last searched or consulted. | | Line 239 | |
| Search strategy | 7 | Present the full search strategies for all databases, registers and websites, including any filters and limits used. | | Supplementary table S4 | |
| Selection process | 8 | Specify the methods used to decide whether a study met the inclusion criteria of the review, including how many reviewers screened each record and each report retrieved, whether they worked independently, and if applicable, details of automation tools used in the process. | | Line 244-248 | |
| Data collection process | 9 | Specify the methods used to collect data from reports, including how many reviewers collected data from each report, whether they worked independently, any processes for obtaining or confirming data from study investigators, and if applicable, details of automation tools used in the process. | | Line 259-270 | |
| Data items | 10a | List and define all outcomes for which data were sought. Specify whether all results that were compatible with each outcome domain in each study were sought (e.g. for all measures, time points, analyses), and if not, the methods used to decide which results to collect. | | Not Applicable | |
| 10b | List and define all other variables for which data were sought (e.g. participant and intervention characteristics, funding sources). Describe any assumptions made about any missing or unclear information. | | Not Applicable | |
| Study risk of bias assessment | 11 | Specify the methods used to assess risk of bias in the included studies, including details of the tool(s) used, how many reviewers assessed each study and whether they worked independently, and if applicable, details of automation tools used in the process. | | Line 290 - 300 | |
| Effect measures | 12 | Specify for each outcome the effect measure(s) (e.g. risk ratio, mean difference) used in the synthesis or presentation of results. | | Not Applicable | |
| Synthesis methods | 13a | Describe the processes used to decide which studies were eligible for each synthesis (e.g. tabulating the study intervention characteristics and comparing against the planned groups for each synthesis (item #5)). | | Not Applicable | |
| 13b | Describe any methods required to prepare the data for presentation or synthesis, such as handling of missing summary statistics, or data conversions. | | Not Applicable | |
| 13c | Describe any methods used to tabulate or visually display results of individual studies and syntheses. | | Not Applicable | |
| 13d | Describe any methods used to synthesize results and provide a rationale for the choice(s). If meta-analysis was performed, describe the model(s), method(s) to identify the presence and extent of statistical heterogeneity, and software package(s) used. | | Line 277-284 | |
| 13e | Describe any methods used to explore possible causes of heterogeneity among study results (e.g. subgroup analysis, meta-regression). | | Not Applicable | |
| 13f | Describe any sensitivity analyses conducted to assess robustness of the synthesized results. | | Line 84-89 | |
| Reporting bias assessment | 14 | Describe any methods used to assess risk of bias due to missing results in a synthesis (arising from reporting biases). | | Not Applicable | |
| Certainty assessment | 15 | Describe any methods used to assess certainty (or confidence) in the body of evidence for an outcome. | | Not Applicable | |
| **RESULTS** |  |  | |  | |
| Study selection | 16a | | Describe the results of the search and selection process, from the number of records identified in the search to the number of studies included in the review, ideally using a flow diagram. | Figure 1 |
|  | 16b | | Cite studies that might appear to meet the inclusion criteria, but which were excluded, and explain why they were excluded. | Not Applicable |
| Study characteristics | 17 | | Cite each included study and present its characteristics. | Supplementary Tables S1, S2 |
| Risk of bias in studies | 18 | | Present assessments of risk of bias for each included study. | Supplementary figure S1 |
| Results of  individual studies | 19 | | For all outcomes, present, for each study: (a) summary statistics for each group (where appropriate) and (b) an effect estimate and its precision (e.g. confidence/credible interval), ideally using structured tables or plots. | Not Applicable |
| Results of syntheses | 20a | | For each synthesis, briefly summarise the characteristics and risk of bias among contributing studies. | Not Applicable |
|  | 20b | | Present results of all statistical syntheses conducted. If meta-analysis was done, present for each the summary estimate and its precision (e.g. confidence/credible interval) and measures of statistical heterogeneity. If comparing groups, describe the direction of the effect. | Figure 2 and 3 |
|  | 20c | | Present results of all investigations of possible causes of heterogeneity among study results. | Not Applicable |
|  | 20d | | Present results of all sensitivity analyses conducted to assess the robustness of the synthesized results. | Figure 4 |
| Reporting biases | 21 | | Present assessments of risk of bias due to missing results (arising from reporting biases) for each synthesis assessed. | Not Applicable |
| Certainty of evidence | 22 | | Present assessments of certainty (or confidence) in the body of evidence for each outcome assessed. | Not Applicable |
| **DISCUSSION** | | | |  |
| Discussion | 23a | | Provide a general interpretation of the results in the context of other evidence. | Page 8 |
|  | 23b | | Discuss any limitations of the evidence included in the review. | Line 212-220 |
|  | 23c | | Discuss any limitations of the review processes used. | Not Applicable |
|  | 23d | | Discuss implications of the results for practice, policy, and future research. | Line 197-199 |
| **OTHER INFORMATION** | | | |  |
| Registration and protocol | 24a | | Provide registration information for the review, including register name and registration number, or state that the review was not registered. | Line 235-236 |
|  | 24b | | Indicate where the review protocol can be accessed, or state that a protocol was not prepared. | Line 235-236 |
|  | 24c | | Describe and explain any amendments to information provided at registration or in the protocol. | Not Applicable |

Table S4 Search terms and filters used in each database

| Database | Keywords | Filters | | |
| --- | --- | --- | --- | --- |
| **Language** | **Document Type** | **Open Access** |
| PubMed | ("Haemophilus influenzae type a" OR "Haemophilus influenzae serotype a" OR "Hia" OR "H. influenzae") AND ("Antimicrobial resistance" OR "Antibiotic resistance" OR "Antibiotic susceptibility" OR "AMR") AND ("Epidemiology") | English | - | Free full-text |
| Scopus | ("Haemophilus influenzae type a" OR "Haemophilus influenzae serotype a" OR "Hia" OR "H. influenzae") AND ("Antimicrobial resistance" OR "Antibiotic resistance" OR "Antibiotic susceptibility" OR "AMR") AND ("Epidemiology") | English | Article | All Open Access |
| Web of Science | ("Haemophilus influenzae type a" OR "Haemophilus influenzae serotype a" OR "Hia" OR "H. influenzae") AND ("Antimicrobial resistance" OR "Antibiotic resistance" OR "Antibiotic susceptibility" OR "AMR") AND ("Epidemiology") | English | Article | Open Access |
| ScienceDirect | ("Haemophilus influenzae type a" OR "Haemophilus influenzae serotype a" OR "Hia" OR "H. influenzae") AND ("Antimicrobial resistance" OR "Antibiotic resistance" OR "Antibiotic susceptibility" OR "AMR") AND ("Epidemiology") | English | Article | Open Access |


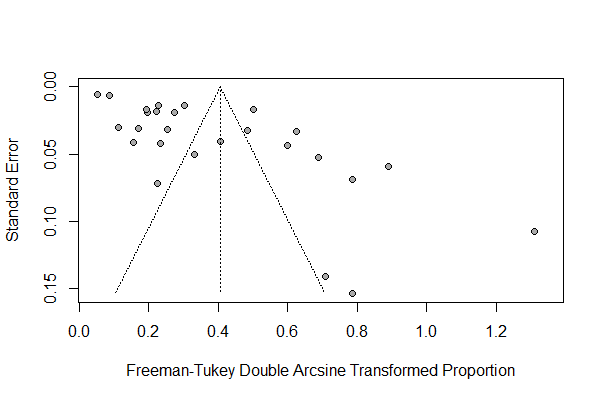


Figure S1: Funnel plot for the publications used in meta-analyses

Egger’s regression: Test result: t = 5.72, df = 24, p-value < 0.0001

Bias estimate: 9.7095 (SE = 1.6979)

**Table S5**. Quality of reporting in the included studies.

| **Study** | **Item 1** | **Item 2** | **Item 3** | **Item 4** | **Item 5** | **Item 6** | **Item 7** | **Item 8** | **Item 9** | **Total score** | **Remark** |
| --- | --- | --- | --- | --- | --- | --- | --- | --- | --- | --- | --- |
| 1. Bajanca-Lavado et al., 2014 | 1 | 1 | 1 | 1 | 1 | 1 | 1 | 1 | 0 | 8 | Good |
| 1. Bajanca-Lavado et al., 2022 | 1 | 1 | 1 | 1 | 1 | 1 | 1 | 1 | 0 | 8 | Good |
| 1. Bertran et al., 2023 | 1 | 1 | 1 | 1 | 1 | 1 | 1 | 1 | 0 | 8 | Good |
| 1. Bruce et al., 2008 | 1 | 1 | 0 | 1 | 1 | 1 | 1 | 0 | 0 | 6 | Fair |
| 1. Bruce et al., 2013 | 1 | 1 | 0 | 0 | 0 | 1 | 1 | 0 | 0 | 4 | Fair |
| 1. Chelbi et al., 2024 | 1 | 1 | 0 | 1 | 1 | 1 | 1 | 0 | 0 | 6 | Fair |
| 1. Crandall et al., 2019 | 1 | 1 | 0 | 0 | 1 | 1 | 1 | 0 | 0 | 5 | Fair |
| 1. Deghmane et al., 2019 | 0 | 1 | 1 | 0 | 0 | 1 | 1 | 1 | 0 | 5 | Fair |
| 1. Desai et al. 2015 | 1 | 1 | 1 | 1 | 1 | 1 | 1 | 1 | 0 | 8 | Good |
| 1. Dudukina et al., 2020 | 1 | 1 | 1 | 1 | 0 | 1 | 1 | 0 | 0 | 6 | Fair |
| 1. Eton et al., 2017 | 1 | 1 | 0 | 1 | 0 | 1 | 1 | 0 | 0 | 5 | Fair |
| 1. Heliodoro et al., 2020 | 1 | 1 | 1 | 1 | 1 | 1 | 1 | 1 | 0 | 8 | Good |
| 1. Ladhani et al., 2010 | 1 | 1 | 1 | 1 | 1 | 1 | 1 | 1 | 0 | 8 | Good |
| 1. Lima et al., 2010 | 1 | 1 | 0 | 1 | 0 | 1 | 1 | 1 | 0 | 6 | Fair |
| 1. McTaggart et al., 2021 | 1 | 1 | 1 | 1 | 1 | 1 | 1 | 1 | 0 | 8 | Good |
| 1. Millar et al., 2005 | 1 | 1 | 0 | 1 | 1 | 1 | 1 | 0 | 0 | 6 | Fair |
| 1. Plumb et al., 2018 | 1 | 1 | 0 | 1 | 1 | 1 | 1 | 0 | 0 | 6 | Fair |
| 1. Potts et al., 2022 | 1 | 1 | 1 | 0 | 1 | 1 | 1 | 0 | 0 | 6 | Fair |
| 1. Sadeghi-Aval et al., 2013 | 1 | 0 | 0 | 1 | 1 | 1 | 1 | 0 | 0 | 5 | Fair |
| 1. Shuel et al., 2011 | 1 | 1 | 0 | 1 | 1 | 1 | 1 | 0 | 0 | 6 | Fair |
| 1. Sill and Tsang, 2008 | 1 | 1 | 0 | 1 | 1 | 1 | 1 | 0 | 0 | 6 | Fair |
| 1. Staples et al., 2017 | 1 | 1 | 1 | 1 | 1 | 1 | 1 | 1 | 0 | 8 | Good |
| 1. Tønnessen et al., 2022 | 1 | 1 | 1 | 1 | 1 | 1 | 1 | 1 | 0 | 8 | Good |
| 1. Tsang et al., 2016 | 1 | 0 | 0 | 0 | 0 | 1 | 1 | 0 | 0 | 3 | Poor |
| 1. Tsang et al., 2006 | 1 | 1 | 1 | 1 | 1 | 1 | 1 | 0 | 0 | 7 | Good |
| 1. Tsang et al., 2017 | 1 | 1 | 1 | 1 | 1 | 1 | 1 | 1 | 0 | 8 | Good |
| 1. Tsang et al., 2017 | 1 | 1 | 0 | 1 | 1 | 1 | 1 | 0 | 0 | 6 | Fair |
| 1. Ulanova et al., 2023 | 1 | 0 | 0 | 1 | 0 | 1 | 1 | 0 | 0 | 4 | Poor |
| 1. Whittaker et al., 2017 | 1 | 1 | 1 | 1 | 1 | 1 | 1 | 1 | 0 | 8 | Good |

**Item 1**: Was the sample frame appropriate to address the target population? **Item 2**: Were study participants sampled in an appropriate way? **Item 3**: Was the sample size adequate? **Item 4**: Were the study subjects and the setting described in detail? **Item 5**: Was the data analysis conducted with sufficient coverage of the identified sample? Item 6: Were valid methods used for the identification of the condition? **Item 7**: Was the condition measured in a standard, reliable way for all participants? **Item 8**: Was there appropriate statistical analysis? **Item 9**: Was the response rate adequate, and if not, was the low response rate managed appropriately
